# Supplementary material
Source: publisher site journal article supplement (https://www.dovepress.com/article/241648)

Table S1 In vitro activities of piperacillin/tazobactam, imipenem, meropenem, ciprofloxacin and ceftriaxone against *Escherichia coli* and *Klebsiella pneumoniae*

| Isolates | MIC (range [MIC50] [MIC90]) (mg/L) | | | | | |
| --- | --- | --- | --- | --- | --- | --- |
| No. | Piperacillin/tazobactam | Imipenem | Meropenem | Ciprofloxacin | Ceftriaxone |
| *Escherichia coli* | 110 | 4-128 [4] [8] | 1-1 [1] [1] | 0.25-025 [0.25] [0.25] | 0.25-8 [1] [4] | 0.25-64 [32] [64] |
| *Klebsiella pneumoniae* | 53 | 4-128 [4] [8] | 1-2 [1] [1] | 0.25-025 [0.25] [0.25] | 0.25-4 [0.25] [4] | 1-64 [1] [32] |

MIC: minimum inhibitory concentration.

Table S2 The dosage regimens of each antibiotic

| Piperacillin/tazobactam | Cefoperazone/sulbactam | Imipenem/sistatin | Meropenem |
| --- | --- | --- | --- |
| 4g/8h | 1.5g/12h  1.5g/8h  3g/12h  3g/8h | 1g/6h  1g/8h | 0.5g/12h  0.5g/8h  1g/12h  1g/8h |

Table S3 Model input parameters

|  | Cefoperazone/  sulbactam-arm | Meropenem-arm | Distribution for PSA | Source |
| --- | --- | --- | --- | --- |
| Outcome |  |  |  |  |
| Success rate | 0.833 (0.417-1.250) | 0.784 (0.392-1.176) | Beta | Original data |
| Death rate | 0.0280 (0.014- 0.042) | 0.081 (0.041 -0.122) | Beta | Original data |
| Failure rate | 0.139 (0.070- 0.209) | 0.203 (0.068 -0.203) | Beta | Original data |
| ADE |  |  |  |  |
| Incidence of TP | 0.030 (0.015- 0.045) | NA | Beta | Supplementary material [1] |
| Cost (CNY) |  |  |  |  |
| Cost of TP | 6319.58 (3110.63-9401) | NA | Gamma | Supplementary material [2] |
| Drug costs | 69.20 (34.60-138.40) | 167.08 (83.54-334.16) | Gamma | NHFPC of China |
| Drug administration cost | 11.50 (5.75-23.00) | 11.50 (5.75-23.00) | Gamma | NHFPC of China |
| Laboratory test cost | 691.42 (345.71-1382.84) | 691.42 (345.71-1382.84) | Gamma | Supplementary material [3] |
| Daily hospitalization costs | 3459 (1729.5-6918) | 3459 (1729.5-6918) | Gamma | Supplementary material [4] |
| Other parameters |  |  |  |  |
| Length of hospitalization | 13 (9-22) | 17 (11-28) | Triangular | Original data |
| Duration of antibiotics | 10 (6-14) | 11 (8-14) | Triangular | Original data |
| Duration of empirical treatment | 3 (1-5) | NA | Triangular | Original data |

ADE, Adverse drug events; PSA, Probability sensitivity analysis; CNY: China yuan; NHFPC: National Health and Family Planning Commission of the People’s Republic; NA, Not applicable.

**References**

1. Zhao suyu, Guo daihong, Xu yuanjie, Zhu man, Chen Chao, Ma liang. Application and evaluation of active monitoring system for thrombocytopenia induced by cefoperazone/sulbactam. Journal of pharmaceutical epidemiology. 2016;1:17-20.
2. Smythe MA, Koerber JM, Fitzgerald M, Mattson JC. The financial impact of heparin-induced thrombocytopenia. Chest. 2008;134: 568-573.
3. Breedt J, Teras J, Gardovskis J et al. Safety and efficacy of tigecycline in treatment of skin and skin structure infections: results of a double-blind phase 3 comparison study with vancomycin-aztreonam. Antimicrob Agents Chemother. 2005;49: 4658-4666.
4. Moran GJ, Fang E, Corey GR, Das AF, De Anda C, Prokocimer P. Tedizolid for 6 days versus linezolid for 10 days for acute bacterial skin and skin-structure infections (ESTABLISH-2): a randomised, double-blind, phase 3, non-inferiority trial. Lancet Infect Dis. 2014;14: 696-70.

**Figure legends**

**Fig. S1** Decision tree model for GNB-BSI. GNB-BSI, gram-negative bacteria bloodstream infection; CPZ/SBT, cefoperazone/sulbactam; MEM, meropenem.

**Fig. S2** Comparisons of the time to defervescence between CPZ/SBT and MEM used as empirical treatment before and after matching. Empty triangle and solid triangle represent the time to defervescence of MEM before and after matching, respectively. Empty circle represents the time to defervescence of CPZ/SBT before and after matching. CPZ/SBT, cefoperazone/sulbactam; MEM, meropenem.


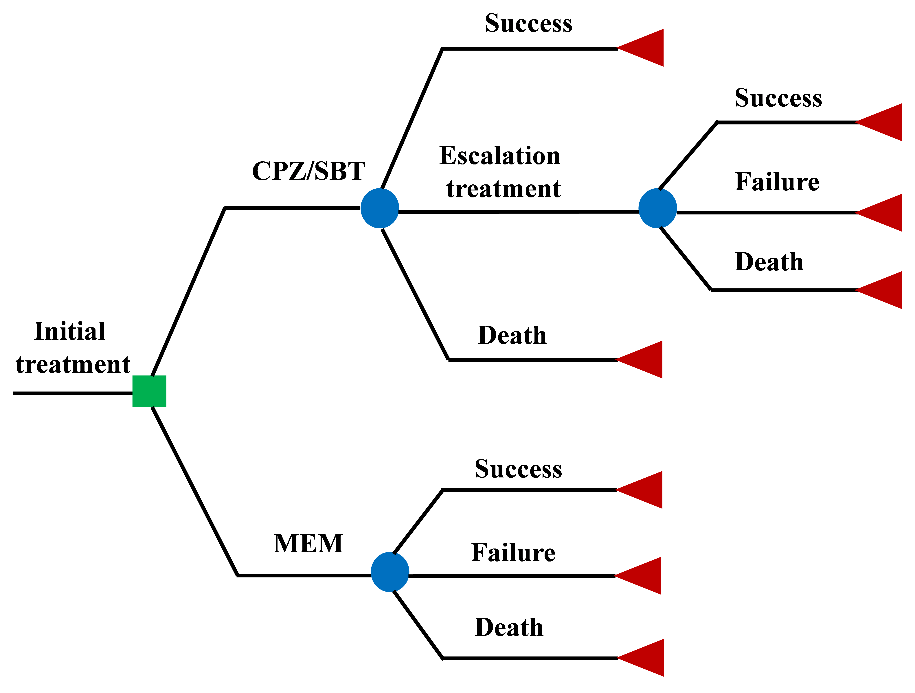


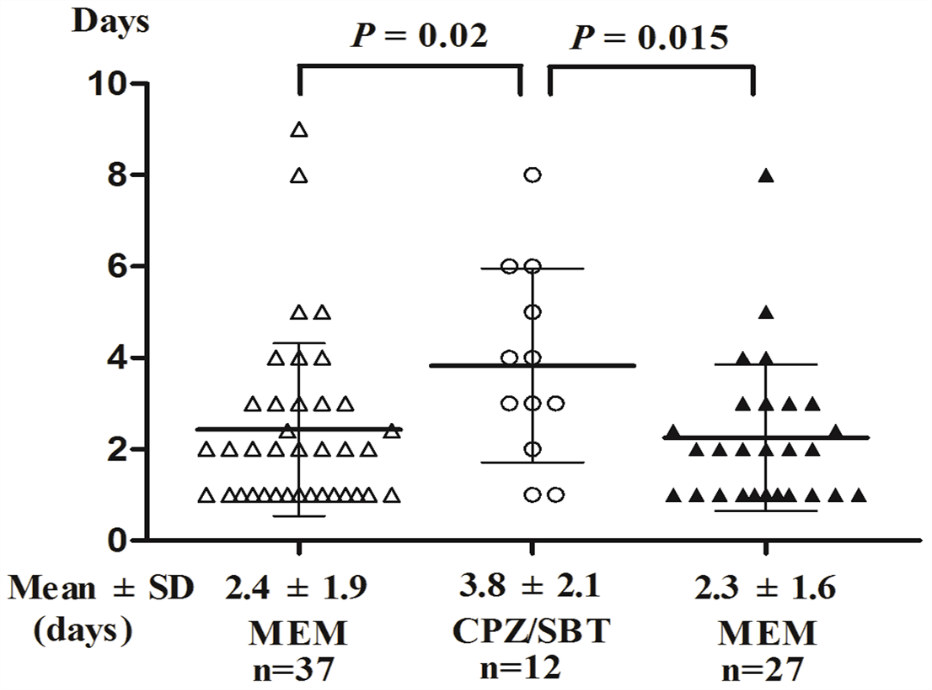

Supplement: Supplementary file 1 [file get_supplementary_file.php]
